# Supplementary material for: Enzymatic characterization of mRNA cap adenosine-N6 methyltransferase PCIF1 activity on uncapped RNAs
Source: PubMed Central journal article supplement — J Biol Chem. 2022 Feb 19;298(4):101751. doi: 10.1016/j.jbc.2022.101751 (PMC8931429; doi:10.1016/j.jbc.2022.101751), 2022-02-19
Supplement: mmc1.pdf [file mmc1.pdf]

## Supplementary information

### Enzymatic characterization of PCIF1, the mRNA cap adenosine-N6 methyltransferase, acting on uncapped RNAs

Dan Yu<sup>1</sup>, Nan Dai<sup>2</sup>, Eric J. Wolf<sup>2</sup>, Ivan R. Corrêa Jr.<sup>2</sup>, Jujun Zhou<sup>1</sup>, Tao Wu<sup>3</sup>, Robert M. Blumenthal<sup>4</sup>, Xing Zhang<sup>1,\*</sup>, Xiaodong Cheng<sup>1,\*</sup>

From the <sup>1</sup>Department of Epigenetics and Molecular Carcinogenesis, University of Texas MD Anderson Cancer Center, Houston, TX 77030, USA; <sup>2</sup>New England Biolabs, Inc, Ipswich, MA 01938 USA; <sup>3</sup>Department of Molecular & Human Genetics, Baylor College of Medicine, Houston, TX 77030, USA; <sup>4</sup>Department of Medical Microbiology and Immunology, and Program in Bioinformatics, The University of Toledo College of Medicine and Life Sciences, Toledo, OH 43614, USA

\* Correspondence: XZhang21@mdanderson.org or XCheng5@mdanderson.org

Email addresses:

DY (DYu6@mdanderson.org); ND (Dain@neb.com); EW (ewolf@neb.com);

IC (correa@neb.com); JZ (JZhou12@mdanderson.org); TW (Tao.Wu@bcm.edu);

RMB (Robert.Blumenthal@utoledo.edu); XZ (XZhang21@mdanderson.org);

XC (XCheng5@mdanderson.org)

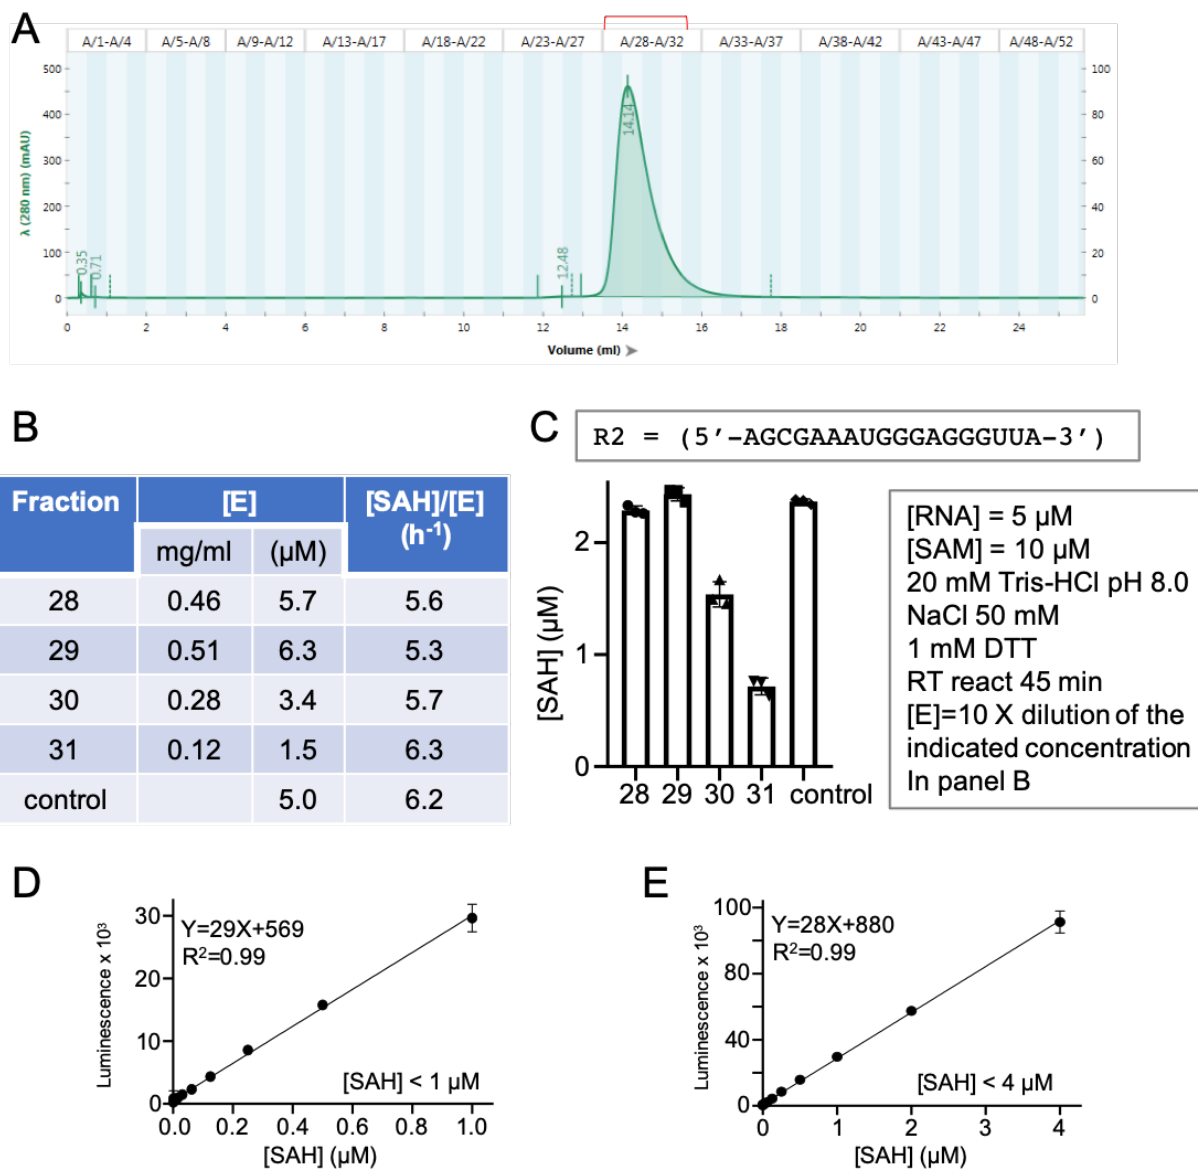

**Figure S1. PCIF1 activity assay.** (A) An example of analytic size exclusion chromatography (Superdex 200 Increase 10/300 GL) showing the peak fractions and retention volume. (B) Summary of four fractions and the corresponding enzyme concentrations and specific activity on RNA oligo R2, measured by the velocity of product SAH formation per enzyme molecule [SAH]/[E]. The control enzyme was taken from a previous purification. (C) The specific activity of each fraction. (D-E) Calibration curves for Promega bioluminescence assay as a function of SAH concentrations in the range of (B) below or (E) above 1  $\mu$ M.

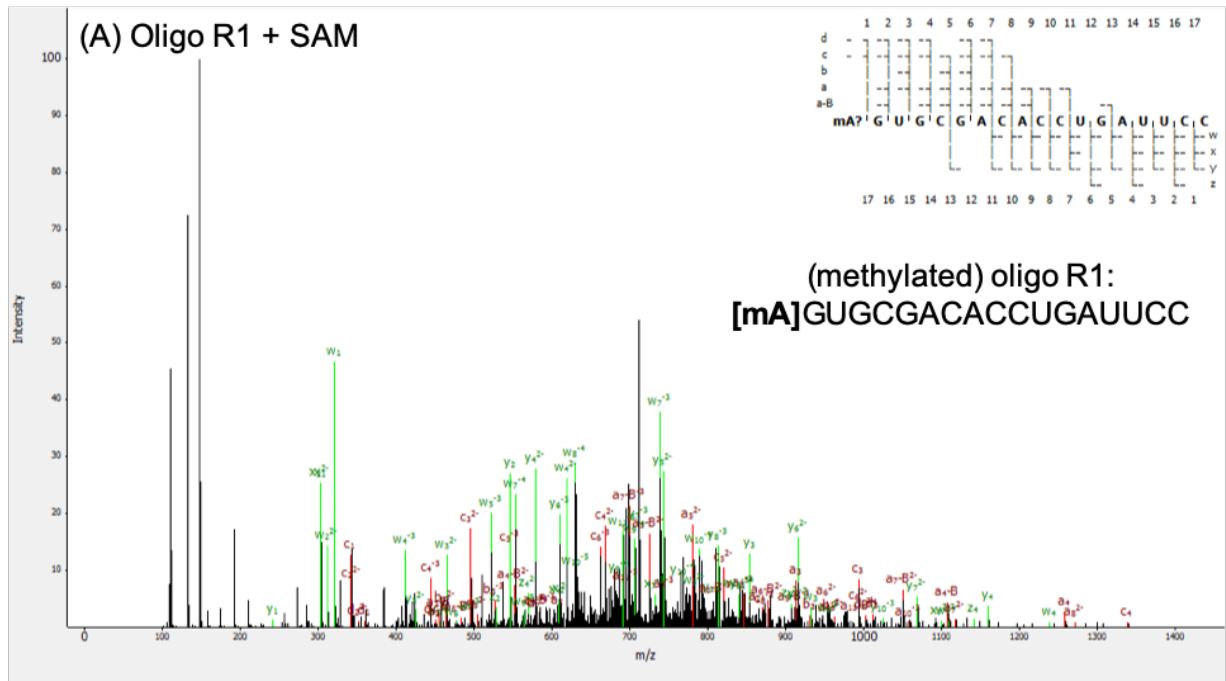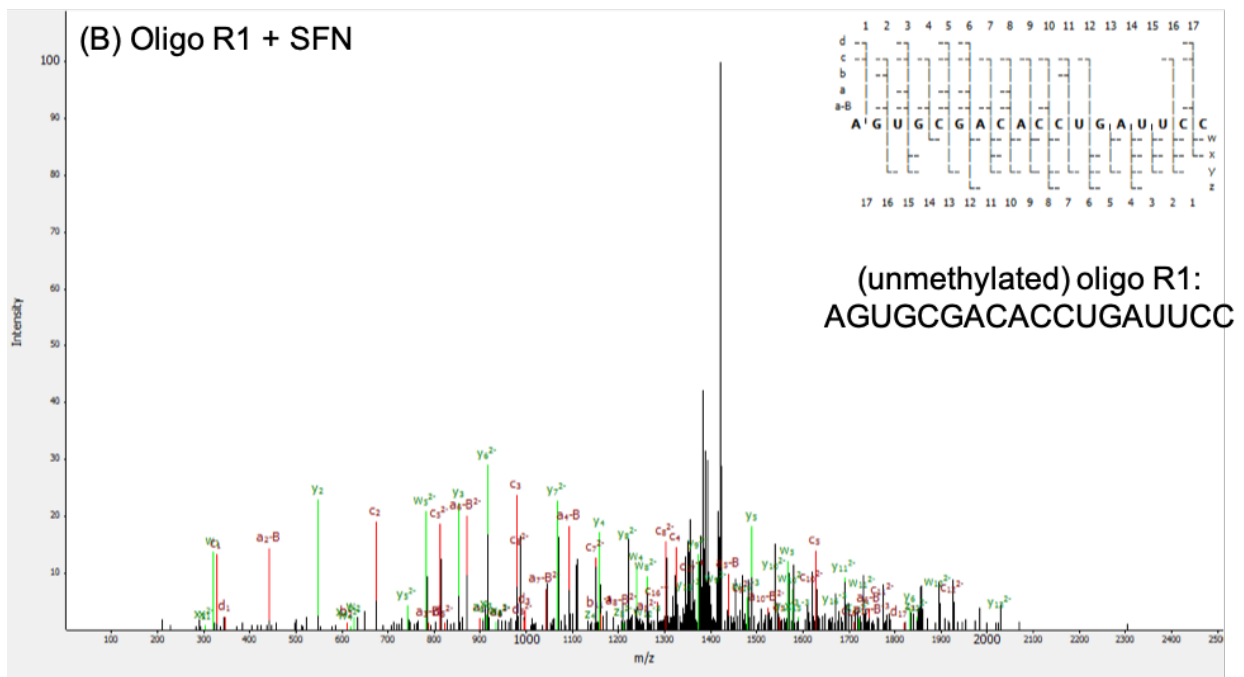

**Figure S2.** Representative tandem mass spectra of oligo R1 in the presence of (A) SAM or (B) sinfungin.

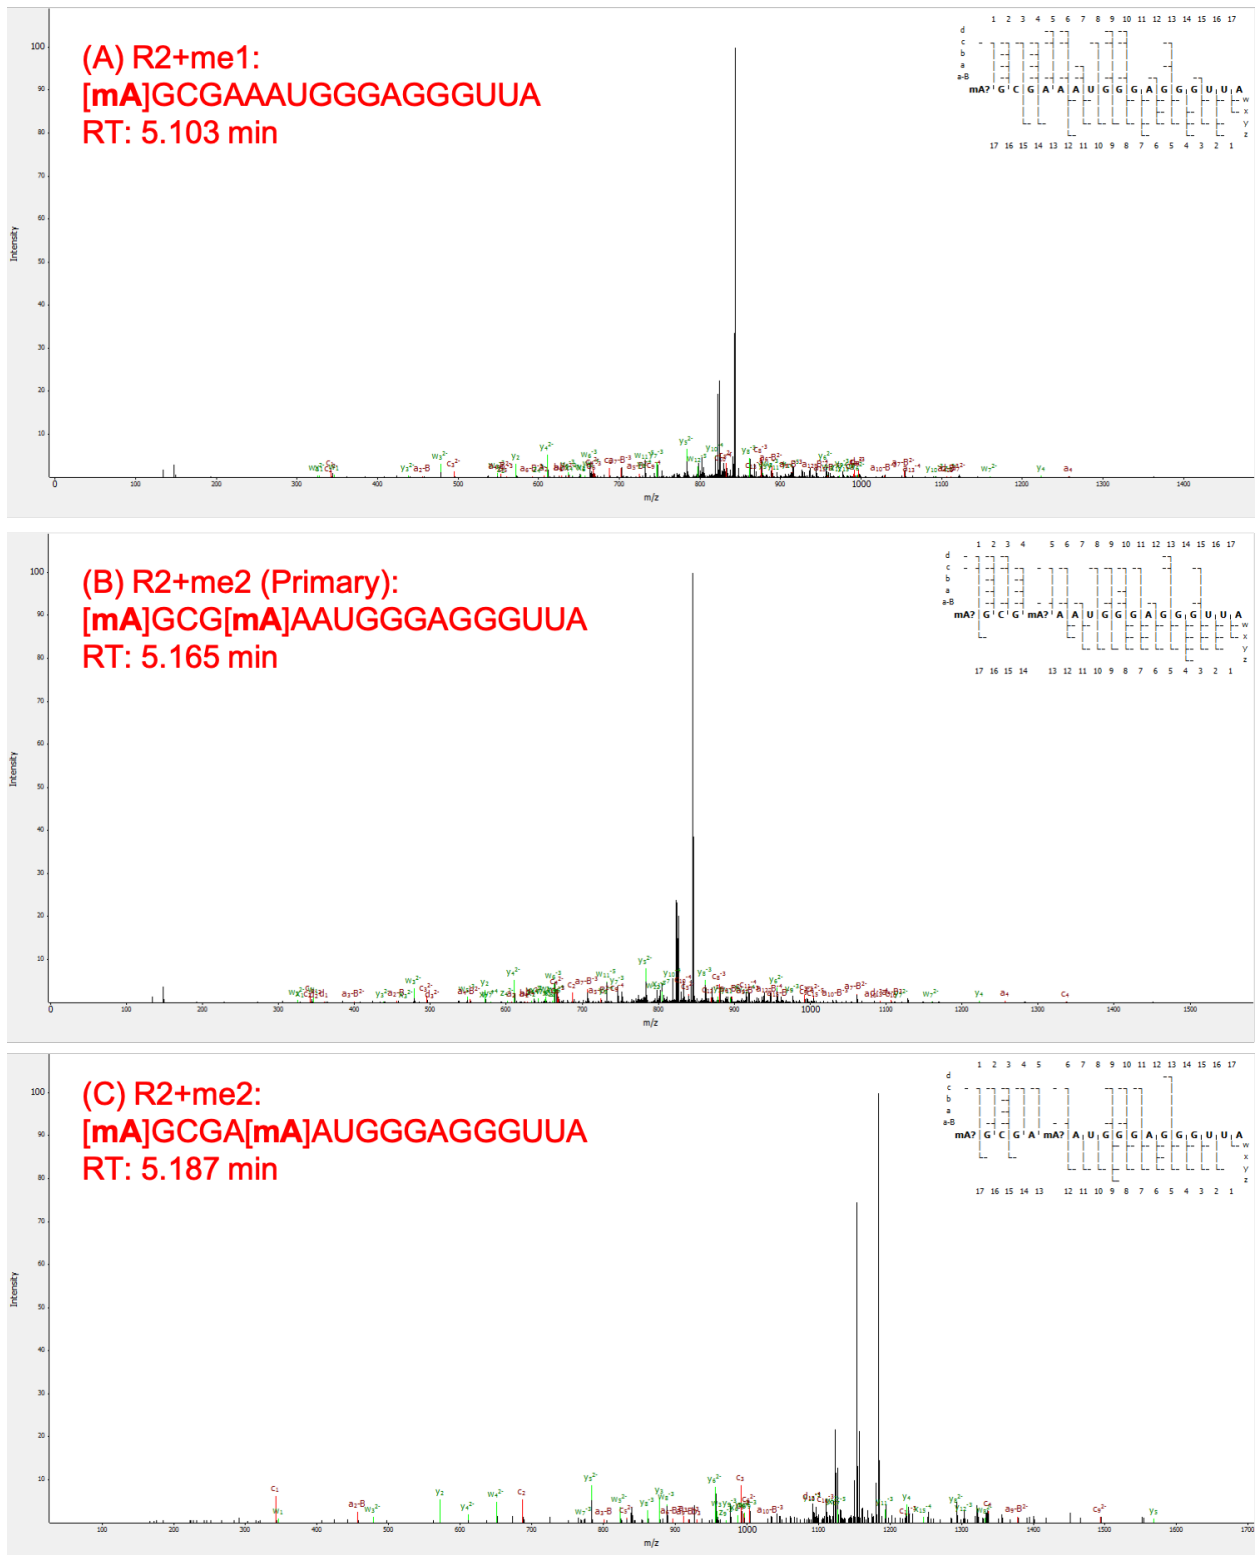

**Figure S3.** Representative tandem mass spectra of intact methylated R2 oligos (A-C).

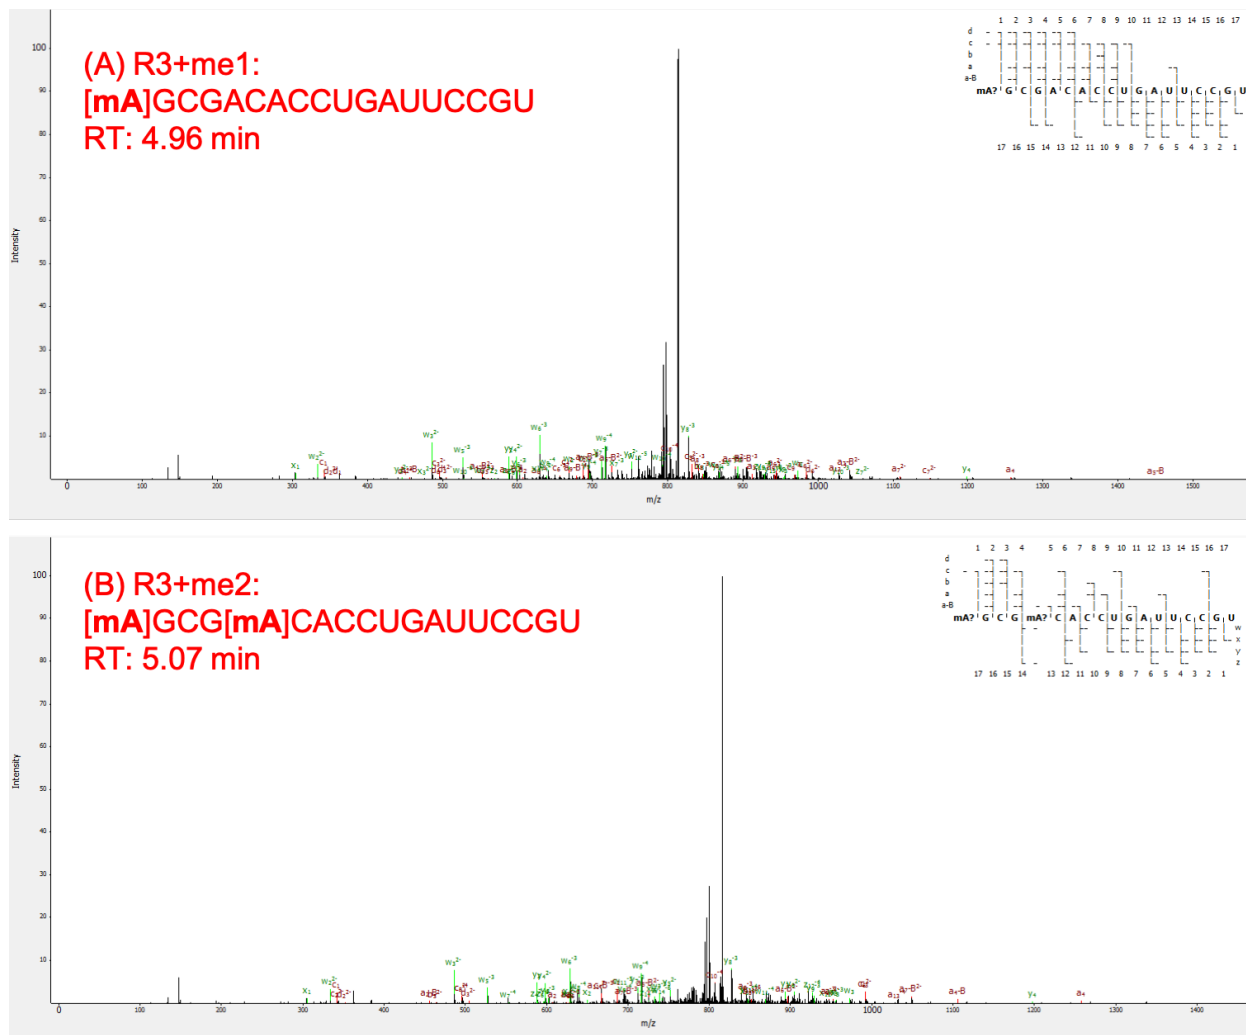

**Figure S4.** Representative tandem mass spectra of intact methylated R3 oligos (A-C).
